# Supplementary material for: Steric effects of the alkyl groups: evaluation on isolated molecules by means of isodesmic reactions
Source: Royal Society of Chemistry journal article supplement (doi:10.1039/b704459c), 2007-01-01
Supplement: b704459c.pdf [file b704459c.pdf]

**Steric effects of the alkyl groups: evaluation the isolated molecules by means of isodesmic reactions**

**Stanislav Böhm<sup>a</sup> and Otto Exner<sup>b</sup>**

<sup>a</sup>*Department of Organic Chemistry, Institute of Chemical Technology, CZ-16628 Praha 6, Czech Republic*

<sup>b</sup>*Institute of Organic Chemistry and Biochemistry, Academy of Sciences of the Czech Republic, CZ-16610 Praha 6, Czech Republic*

Supplementary information

**Table S1** DFT-Energies of alkyl substituted cyclopropanes **1**, **3** and cyclopentanes **4**, **5** (in a. u.)

| Substituents     | <b>1</b> <i>cis</i> -1,2-<br>cyclopropane | <b>3</b> <i>trans</i> -1,2-<br>cyclopropane | <b>4</b> <i>cis</i> -1,2-<br>cyclopentane | <b>5</b> <i>trans</i> -1,2-<br>cyclopentane |
|------------------|-------------------------------------------|---------------------------------------------|-------------------------------------------|---------------------------------------------|
| H H              | -117.9309084                              |                                             | -196.6116632                              |                                             |
| H Me             | -157.2579373                              |                                             | -235.9377095                              |                                             |
| H Et             | -196.5823742                              |                                             | -275.2587061                              |                                             |
| H Pr             | -235.906735                               |                                             |                                           |                                             |
| H <i>i</i> -Bu   | -275.2306824                              |                                             |                                           |                                             |
| H <i>neo</i> -Pe | -314.5535534                              |                                             | -393.2299465                              |                                             |
| H <i>i</i> -Pr   | -235.9075789                              |                                             | -314.5826418                              |                                             |
| H <i>t</i> -Bu   | -275.2290857                              |                                             | -353.9057662                              |                                             |
| Me Me            | -196.5826017                              | -196.5848101                                | -275.2600556                              | -275.2633460                                |
| Me Et            | -235.9068233                              | -235.9092505                                | -314.5834383                              | -314.5866148                                |
| Me Pr            | -275.2312052                              | -275.2335868                                |                                           |                                             |

Supplementary Material (ESI) for Organic and Biomolecular Chemistry  
This journal is © The Royal Society of Chemistry 2007

|                               |              |              |              |              |
|-------------------------------|--------------|--------------|--------------|--------------|
| Me <i>i</i> -Bu               | -314.5549981 | -314.5575471 |              |              |
| Me <i>neo</i> -Pe             | -353.8778981 | -353.8804087 | -432.5519854 | -432.5476252 |
| Me <i>i</i> -Pr               | -275.2317861 | -275.2343981 | -353.9019984 | -353.9081660 |
| Me <i>t</i> -Bu               | -314.5049389 | -314.555796  | -393.2239381 | -393.2296127 |
| Et Et                         | -275.2311635 | -275.2336602 | -353.9060772 | -353.9097884 |
| Et Pr                         | -314.5555084 | -314.5580064 |              |              |
| Et <i>i</i> -Bu               | -353.8792602 | -353.8820322 |              |              |
| Et <i>neo</i> -Pe             | -393.2021895 | -393.2048485 | -471.8746934 | -471.8704767 |
| Et <i>i</i> -Pr               | -314.5560613 | -314.5556904 | -393.2251787 | -393.2312672 |
| Et <i>t</i> -Bu               | -353.8735852 | -353.8802601 | -432.5460661 | -432.5530201 |
| Pr Pr                         | -353.879844  | -353.8823401 |              |              |
| Pr <i>i</i> -Bu               | -393.2036229 | -393.2063146 |              |              |
| Pr <i>neo</i> -Pe             | -432.5259809 | -432.5292031 |              |              |
| Pr <i>i</i> -Pr               | -353.8804486 | -353.8831679 |              |              |
| Pr <i>t</i> -Bu               | -393.1979447 | -393.2045995 |              |              |
| <i>i</i> -Bu <i>i</i> -Bu     | -432.5273466 | -432.5302497 |              |              |
| <i>i</i> -Bu <i>neo</i> -Pe   | -471.8502939 | -471.8531451 |              |              |
| <i>i</i> -Bu <i>i</i> -Pr     | -393.2042189 | -393.2071578 |              |              |
| <i>i</i> -Bu <i>t</i> -Bu     | -432.5214537 | -432.5286076 |              |              |
| <i>neo</i> -Pe <i>neo</i> -Pe | -511.1731775 | -511.1759038 | -589.8429021 | -589.8316209 |
| <i>neo</i> -Pe <i>i</i> -Pr   | -432.5242375 | -432.5288875 | -511.1940703 | -511.1926087 |
| <i>neo</i> -Pe <i>t</i> -Bu   | -471.8445368 | -471.8514264 | -550.5091423 | -550.5122386 |
| <i>i</i> -Pr <i>i</i> -Pr     | -353.8796818 | -353.8839116 | -432.5440522 | -432.5529357 |
| <i>i</i> -Pr <i>t</i> -Bu     | -393.1974788 | -393.2052741 | -393.2239381 | -471.8742854 |
| <i>t</i> -Bu <i>t</i> -Bu     | -432.5109815 | -432.5266948 | -511.1755161 | -511.1916306 |

---

**Table S2** Calculated energies of bicyclo[2.2.2]octane derivatives **2** and **6**

| Substituent    | 1-alkyl-BCO               | <b>2</b>              | <b>6</b>               |
|----------------|---------------------------|-----------------------|------------------------|
|                |                           | 1-alkyl-trimethyl-BCO | 1-alkyl-hexamethyl-BCO |
| H              | -313.3717029 <sup>a</sup> | -431.3438193          | -549.2609652           |
| Me             | -352.6984378 <sup>a</sup> | -470.6634205          | -588.5818250           |
| Et             | -392.0191784              | -509.9777481          | -627.8932125           |
| Pr             | -431.3433483              | -549.3019033          | -667.2172984           |
| <i>i</i> -Bu   | -470.6639327              | -588.6191907          | -706.5331578           |
| <i>neo</i> -Pe | -509.9818325              | -627.9315463          | -745.8389234           |
| <i>i</i> -Pr   | -431.3393120              | -549.2914039          | -667.1987679           |
| <i>t</i> -Bu   | -470.6583232 <sup>a</sup> | -588.6035611          | -706.5002708           |

**Table S3** Some calculated geometrical parameters of bicyclo[2.2.2]octane derivatives **2** and **6**

| Compound                | C1–C2 |       |       | $\angle$ C(X)-C1-C2 |       |       | $\angle$ C1-C2-C(H <sub>3</sub> ) |       |       |       |       |       |
|-------------------------|-------|-------|-------|---------------------|-------|-------|-----------------------------------|-------|-------|-------|-------|-------|
| <b>2</b> H              | 1.552 | 1.552 | 1.552 |                     |       |       | 114.1                             | 114.1 | 114.1 |       |       |       |
| <b>2</b> Me             | 1.565 | 1.565 | 1.565 | 111.0               | 111.0 | 111.0 | 115.6                             | 115.6 | 115.6 |       |       |       |
| <b>2</b> Et             | 1.570 | 1.572 | 1.575 | 108.9               | 112.1 | 113.3 | 115.7                             | 116.3 | 118.1 |       |       |       |
| <b>2</b> Pr             | 1.569 | 1.573 | 1.576 | 108.9               | 112.1 | 113.3 | 115.9                             | 116.3 | 118.1 |       |       |       |
| <b>2</b> <i>i</i> -Bu   | 1.566 | 1.572 | 1.575 | 107.9               | 112.1 | 113.0 | 114.9                             | 115.6 | 116.8 |       |       |       |
| <i>eo</i> -Pe           | 1.570 | 1.571 | 1.588 | 104.4               | 113.3 | 116.3 | 115.5                             | 115.9 | 116.9 |       |       |       |
| <b>2</b> <i>i</i> -Pr   | 1.570 | 1.573 | 1.578 | 109.9               | 111.3 | 112.9 | 115.0                             | 115.8 | 117.4 |       |       |       |
| <b>2</b> <i>t</i> -Bu   | 1.583 | 1.583 | 1.583 | 112.1               | 112.1 | 112.1 | 116.8                             | 116.8 | 116.8 |       |       |       |
| <b>6</b> H              | 1.594 | 1.594 | 1.594 |                     |       |       | 111.9                             | 115.2 | 111.9 | 115.2 | 111.9 | 115.2 |
| <b>6</b> Me             | 1.620 | 1.620 | 1.620 | 110.6               | 110.6 | 110.6 | 113.8                             | 116.3 | 113.8 | 116.3 | 113.8 | 116.3 |
| <b>6</b> Et             | 1.620 | 1.624 | 1.638 | 106.8               | 112.7 | 113.9 | 114.3                             | 116.9 | 114.5 | 116.3 | 115.3 | 115.9 |
| <b>6</b> Pr             | 1.622 | 1.622 | 1.637 | 107.0               | 112.2 | 114.1 | 113.8                             | 117.2 | 114.8 | 115.7 | 115.0 | 115.9 |
| <b>6</b> <i>i</i> -Bu   | 1.624 | 1.625 | 1.645 | 105.8               | 113.8 | 114.4 | 114.3                             | 117.3 | 115.0 | 116.0 | 115.5 | 116.1 |
| <b>6</b> <i>neo</i> -Pe | 1.620 | 1.632 | 1.651 | 104.0               | 113.4 | 117.3 | 114.3                             | 115.7 | 115.4 | 115.6 | 115.5 | 116.6 |
| <b>6</b> <i>i</i> -Pr   | 1.624 | 1.641 | 1.650 | 109.2               | 111.3 | 115.1 | 114.3                             | 117.3 | 114.6 | 116.9 | 114.9 | 116.7 |
| <b>6</b> <i>t</i> -Bu   | 1.657 | 1.657 | 1.657 | 112.8               | 112.8 | 112.8 | 116.6                             | 117.3 | 116.6 | 117.3 | 116.6 | 117.3 |
